# Supplementary material for: Fabrication of a polymer/aligned shish-kebab composite: microstructure and mechanical properties
Source: Royal Society of Chemistry journal article supplement (doi:10.1039/c5ra07453c), 2015-01-01
Supplement: c5ra07453c1.pdf [file c5ra07453c1.pdf]

## Electronic Supplementary Information

### Fabrication of Polymer/Aligned Shish-Kebab Composite: Microstructure and Mechanical Properties

Haili Zheng, Yabo Quan, Guoqiang Zheng,\* Kun Dai, Chuntai Liu,\* and Changyu Shen

<sup>a</sup> *College of Materials Science and Engineering, The Key Laboratory of Material Processing and Mold of Ministry of Education, Zhengzhou University, Zhengzhou, 450002, P.R. China*

Corresponding Authors: Guoqiang Zheng (gqzheng@zzu.edu.cn), Chuntai Liu (ctliu@zzu.edu.cn).

Tel.: +86 371 63887600

#### 1) Calculation method of the content of USKM in the USKM/LLDPE composite

As the USKM/LLDPE composite was prepared by solution casting method, both the weight of USKM and USKM/LLDPE composite must be obtained through weighing and calculation. After the shear-induced crystallization of UHMWPE/xylene solution, the USKM was collected on the ferrum frame. The USKM together with the ferrum frame could be weighed and the weight was  $m_1$ . Then LLDPE/xylene solution was casted on the USKM. After the solvent was absolutely evaporated, the USKM/LLDPE casted composite as well as the ferrum

frame was weighed and the weight was  $m_3$ . Moreover, the ferrum frame should be taken out before the USKM/LLDPE casted composite was pressed using the vacuum-assisted compression molding machine. After being taken out, the ferrum frame was weighed and the weight was  $m_2$ . Therefore, the weight of the USKM could be obtained by

$$m_{USKM} = m_1 - m_2 \quad (1)$$

where  $m_{USKM}$  represented weight of the USKM. Meanwhile, the weight of USKM/LLDPE composite was calculated by

$$m_{composite} = m_3 - m_2 \quad (2)$$

where  $m_{composite}$  represented weight of the USKM/LLDPE composite. So, the concentration of USKM in the USKM/LLDPE composite was

$$r = \frac{m_{USKM}}{m_{composite}} \times 100\% = \frac{m_1 - m_2}{m_3 - m_2} \times 100\% \quad (3)$$

## 2) Preparation of rectangular specimens for tensile test

As shown in Figure S1, rectangular specimens with a length of 10 mm and width of 5 mm were cut from centre of the compression moulded samples along the alignment direction of the shish-kebabs in USKM. The tensile direction was along the alignment direction of the shish-kebabs, *i.e.*, along the length direction of the rectangular specimens.

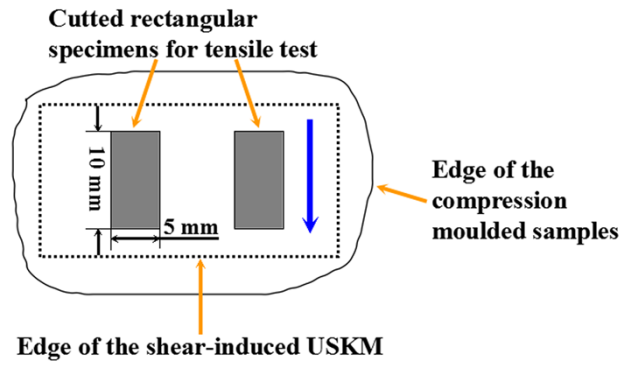

Figure S1. Schematic of the preparation of rectangular specimens for tensile test. The blue arrow refers to shear direction of the USKM.

### 3) Supplementary SEM images of the USKM/LLDPE composite

As shown in Figure S2, fibrils indicated by blue arrows can be clearly observed in the USKM/LLDPE composite. Owing to incomplete etching, not all fibrils can be substantially exposed. Clearly, these fibrils are embedded into LLDPE matrix.

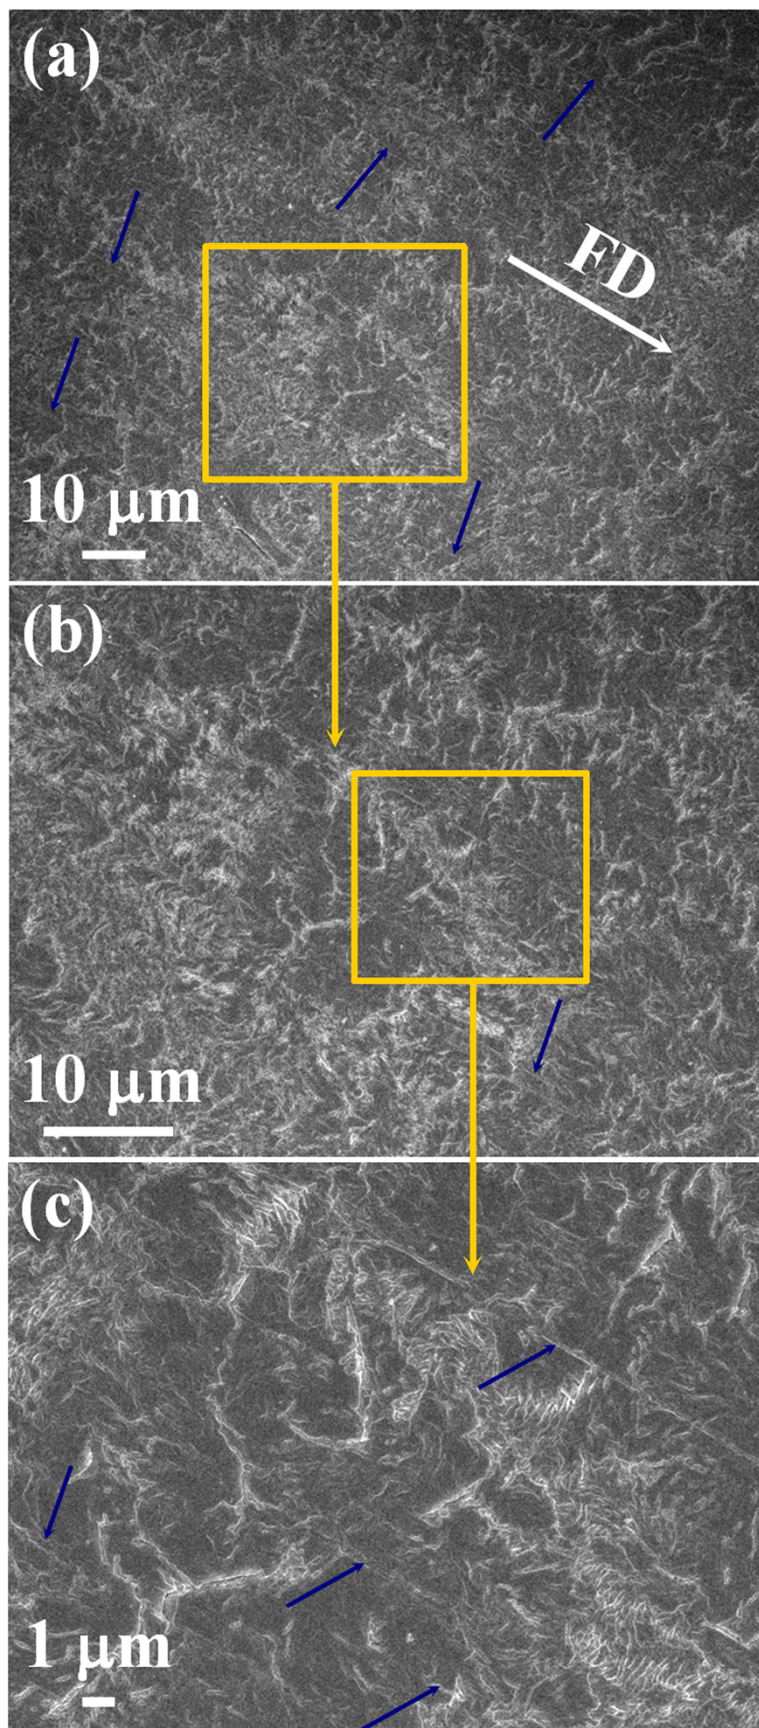

Figure S2. Supplementary SEM images of the USKM/LLDPE composite. The white arrow refers

to flow direction of shish structures.
